# Supplementary material for: The pathway to orthopaedic surgery: a population study of the role of access to primary care and availability of orthopaedic services in Ontario, Canada
Source: HighWire-hosted journal article supplement (doi:10.1136/bmjopen-2013-004472), 2014-07-01
Supplement: bmjopen-2013-004472supp_tables.pdf [file bmjopen-2013-004472supp_tables.pdf]

Table A1: Available physician billing codes relevant to musculoskeletal disorders: Ontario Health Insurance Plan\*

| Diagnostic groups                       | Description                                                                                                                                                                                                                                                                                       | Billing codes                                                                                         | # of People <sup>a</sup> | # of Visits <sup>b</sup> |
|-----------------------------------------|---------------------------------------------------------------------------------------------------------------------------------------------------------------------------------------------------------------------------------------------------------------------------------------------------|-------------------------------------------------------------------------------------------------------|--------------------------|--------------------------|
| <b>Injury and related conditions</b>    |                                                                                                                                                                                                                                                                                                   |                                                                                                       | <b>213,047</b>           | <b>501,277</b>           |
| Fractures/dislocations                  | <b>Dislocations:</b> shoulder, elbow, finger, other<br><b>Fractures and Dislocations:</b> vertebral column without spinal damage, vertebral column with spinal damage, ribs, pelvis, clavicle, humerus, radius/ulna, carpal bones, metacarpals, phalanges, femur, fibula/tibia, ankle, leg, other | 831, 832, 834, 839<br>805, 806, 807, 808, 810,<br>812, 813, 814, 815, 816,<br>821, 823, 824, 827, 829 | 108,968                  | 279,619                  |
| Strains/sprains of spine                | Coccyx, neck, low back                                                                                                                                                                                                                                                                            | 847                                                                                                   | 3,647                    | 5,286                    |
| Other Strains/sprains                   | shoulder/upper arm, elbow, wrist/hand and fingers, knee/leg, ankle/foot & toes, coccyx/neck, other                                                                                                                                                                                                | 840, 841, 842, 843, 844,<br>845, 848                                                                  | 108,312                  | 216,372                  |
| <b>Arthritis and related conditions</b> |                                                                                                                                                                                                                                                                                                   |                                                                                                       | <b>230,642</b>           | <b>465,711</b>           |
| Rheumatoid arthritis                    | Rheumatoid arthritis, still's disease                                                                                                                                                                                                                                                             | 714                                                                                                   | 2,173                    | 4,163                    |
| Ankylosing spondylitis                  | Ankylosing spondylitis                                                                                                                                                                                                                                                                            | 720                                                                                                   | 794                      | 1,205                    |
| Connective tissue                       | Disseminated lupus erythematosus, scleroderma, polyarteritis nodosa, temporal arteritis                                                                                                                                                                                                           | 710, 446                                                                                              | 41                       | 79                       |
| Osteoarthritis                          | Osteoarthritis                                                                                                                                                                                                                                                                                    | 715                                                                                                   | 123,371                  | 241,751                  |
| Joint derangement                       | Joint derangement, recurrent dislocation, ankylosis, meniscus or cartilage tear, loose body in joint                                                                                                                                                                                              | 717, 718                                                                                              | 64,573                   | 115,787                  |
| Synovitis                               | Synovitis, tenosynovitis, bursitis, bunion                                                                                                                                                                                                                                                        | 727                                                                                                   | 35,147                   | 59,904                   |
| Traumatic arthritis                     | Traumatic arthritis, Pyogenic arthritis                                                                                                                                                                                                                                                           | 716,711                                                                                               | 2,636                    | 4,530                    |
| Gout                                    | Gout                                                                                                                                                                                                                                                                                              | 274, 712                                                                                              | 153                      | 224                      |
| Soft tissue disorders                   | Dupuytren's contracture, Fibrositis, myositis, muscular rheumatism                                                                                                                                                                                                                                | 728, 729                                                                                              | 1,539                    | 2,467                    |
| Other arthritis                         |                                                                                                                                                                                                                                                                                                   | 739                                                                                                   | 18,024                   | 35,601                   |
| <b>Bone and spine conditions</b>        |                                                                                                                                                                                                                                                                                                   |                                                                                                       | <b>37,806</b>            | <b>65,315</b>            |
| Spine                                   | Spondylosis and allied disorders, intervertebral disc disorders, pain neck, lumbar strain, lumbago, coccydynia, sciatica, lumbar disc disease (degenerative), scoliosis                                                                                                                           | 721, 722, 723, 724, 737                                                                               | 25,257                   | 40,865                   |
| Bone                                    | Osteomyelitis, osteochondritis, legg-perthes disease, osteoporosis, spontaneous fracture, other disorders of bone & cartilage, flat foot, pes planus, hallux valgus, hallux varus, hammer toe                                                                                                     | 730, 731, 732, 733, 734,<br>735                                                                       | 12,688                   | 24,450                   |
| <b>Unspecified MSD</b>                  |                                                                                                                                                                                                                                                                                                   |                                                                                                       | <b>781</b>               | <b>28,896</b>            |
| <b>Musculoskeletal Disorders</b>        |                                                                                                                                                                                                                                                                                                   |                                                                                                       | <b>477,003</b>           | <b>1,082,726</b>         |

\* Available billing codes are a modified and abbreviated list based on ICD-9. <sup>a</sup> Number of people with at least one visit to an orthopaedic surgeon (Note that people can have visits for multiple conditions). <sup>b</sup> Number of visits to orthopaedic surgeons.

Table A2: Available diagnostic codes relevant to musculoskeletal disorders: Discharge Abstract Database\*

| Diagnostic groups                       | Description                                                                                                                                                                                                             | ICD code                                                                                                                                        | # of People <sup>a</sup> | # of Surgeries <sup>b</sup> |
|-----------------------------------------|-------------------------------------------------------------------------------------------------------------------------------------------------------------------------------------------------------------------------|-------------------------------------------------------------------------------------------------------------------------------------------------|--------------------------|-----------------------------|
| <b>Injury and related conditions</b>    |                                                                                                                                                                                                                         |                                                                                                                                                 | <b>30,076</b>            | <b>30,948</b>               |
| Fractures/dislocations                  | <b>Dislocations:</b> neck, spine & pelvis, shoulder, elbow, hand & wrist, hip, knee & patella, ankle & foot<br><b>Fractures:</b> neck, spine & pelvis, shoulder, elbow, hand & wrist, hip, knee & patella, ankle & foot | S13.0-S13.3, S33.0-S33.3, S43.0-S43.3, S53.0-S53.1, S63.0-S63.2, S73.0, S83.0-S83.1, S93.0-S93.3<br>T08, S12, S32, S42, S52, S62, S72, S82, S92 | 27,750                   | 28,570                      |
| Other Strains/sprains                   | neck and lumbar spine, shoulder, elbow, hand & wrist, hip, knee & patella, ankle & foot                                                                                                                                 | S13.4, S13.5, S33.5-S33.7, S43.4-S43.7, S53.2-S53.4, S63.3-S63.7, S73.1, S83.2-S83.7, S93.4-S93.6                                               | 2,346                    | 2,378                       |
| <b>Arthritis and related conditions</b> |                                                                                                                                                                                                                         |                                                                                                                                                 | <b>84,904</b>            | <b>89,280</b>               |
| Rheumatoid arthritis                    | Rheumatoid arthritis, still's disease                                                                                                                                                                                   | M05 - M09                                                                                                                                       | 820                      | 875                         |
| Ankylosing spondylitis                  | Ankylosing spondylitis                                                                                                                                                                                                  | M45, M46                                                                                                                                        | 118                      | 125                         |
| Connective tissue                       | Disseminated lupus erythematosus, scleroderma, polyarteritis nodosa, temporal arteritis                                                                                                                                 | M30-M36                                                                                                                                         | 640                      | 751                         |
| Osteoarthritis                          | Osteoarthritis                                                                                                                                                                                                          | M15-M19                                                                                                                                         | 37,261                   | 38,779                      |
| Joint derangement                       | Joint derangement, recurrent dislocation, ankylosis, meniscus or cartilage tear, loose body in joint                                                                                                                    | M22-M24                                                                                                                                         | 25,459                   | 26,112                      |
| Synovitis                               | Synovitis, tenosynovitis, bursitis, bunion                                                                                                                                                                              | M65-M71                                                                                                                                         | 7,612                    | 7,871                       |
| Traumatic arthritis                     | Traumatic arthritis, pyogenic arthritis                                                                                                                                                                                 | M00-M03, M12                                                                                                                                    | 527                      | 563                         |
| Gout                                    | Gout                                                                                                                                                                                                                    | M10, M11, M14                                                                                                                                   | 238                      | 242                         |
| Soft tissue disorders                   | Disorders of muscle<br>Fibroblastic disorders, Soft tissue disorders in diseases classified elsewhere<br>Shoulder lesions, enthesopathies lower limb                                                                    | M60-M63<br>M72-M73<br>M75-M77                                                                                                                   | 11,723                   | 12,590                      |
| Other arthritis                         | Fibrositis, myositis, muscular rheumatism<br>Other arthritis, other MSK disorders                                                                                                                                       | M79<br>M13, M96, M99                                                                                                                            | 1,349                    | 1,372                       |
| <b>Bone and spine conditions</b>        |                                                                                                                                                                                                                         |                                                                                                                                                 | <b>20,551</b>            | <b>29,492</b>               |
| Spine                                   | Deforming dorsopathies, spondylosis, other dorsopathies Spinal stenosis, ankylosing hyperostosis, other spondylopathies                                                                                                 | M40-M43, M47, M49-M54<br>M48.0-M48.3, M48.8-M48.9                                                                                               | 8,906                    | 15,323                      |
| Bone                                    | Osteopathies and chondropathies, traumatic spondilopathy<br>Acquired deformities of fingers and toes, hallux valgus                                                                                                     | M80-M90, M91-M94, M48.4, M48.5<br>M20, M21.4, L60.0, L60.2, L84                                                                                 | 11,700                   | 14,169                      |
| <b>Unspecified MSD</b>                  | other acquired deformities, other joint disorders                                                                                                                                                                       | M21 excluding. M21.4, M25                                                                                                                       | <b>3,322</b>             | <b>3,478</b>                |
| <b>Musculoskeletal Disorders</b>        |                                                                                                                                                                                                                         |                                                                                                                                                 | <b>132,630</b>           | <b>153,198</b>              |

\* ICD-10 diagnostic codes. <sup>a</sup> Number of people with at least one hospital encounter with an orthopaedic surgeon as the main healthcare provider (Note that people can have visits for multiple conditions). <sup>b</sup> Number of orthopaedic surgeries.

Table A3: Multilevel Poisson regression models of office visits to orthopaedic surgeons for arthritis and injury: results for the effects of age and sex, Ontario: 2007-08

|                                   | MSD      |                |         | Arthritis |                |         | Injury   |                |         |
|-----------------------------------|----------|----------------|---------|-----------|----------------|---------|----------|----------------|---------|
|                                   | Estimate | Standard Error | p-value | Estimate  | Standard Error | p-value | Estimate | Standard Error | p-value |
| <b>Intercept</b>                  | -3.561   | 0.028          | <.0001  | -4.852    | 0.036          | <.0001  | -3.940   | 0.039          | <.0001  |
| <b>Sex</b><br>(Ref: Men)          | -0.524   | 0.025          | <.0001  | -0.379    | 0.034          | <.0001  | -0.701   | 0.030          | <.0001  |
| <b>Age groups</b><br>(Ref: 18-24) |          |                |         |           |                |         |          |                |         |
| 25-34                             | -0.044   | 0.023          | 0.057   | 0.145     | 0.031          | <.0001  | -0.192   | 0.028          | <.0001  |
| 35-44                             | 0.166    | 0.022          | <.0001  | 0.561     | 0.029          | <.0001  | -0.146   | 0.028          | <.0001  |
| 45-54                             | 0.544    | 0.022          | <.0001  | 1.098     | 0.029          | <.0001  | 0.100    | 0.027          | 0.000   |
| 55-64                             | 0.824    | 0.022          | <.0001  | 1.525     | 0.028          | <.0001  | 0.248    | 0.027          | <.0001  |
| 65-74                             | 1.022    | 0.022          | <.0001  | 1.806     | 0.029          | <.0001  | 0.334    | 0.028          | <.0001  |
| 75+                               | 1.067    | 0.023          | <.0001  | 1.800     | 0.029          | <.0001  | 0.486    | 0.028          | <.0001  |
| <b>Age by sex</b>                 |          |                |         |           |                |         |          |                |         |
| 25-34                             | 0.146    | 0.034          | <.0001  | -0.001    | 0.046          | 0.978   | 0.241    | 0.042          | <.0001  |
| 35-44                             | 0.325    | 0.033          | <.0001  | 0.151     | 0.043          | 0.001   | 0.456    | 0.041          | <.0001  |
| 45-54                             | 0.571    | 0.032          | <.0001  | 0.410     | 0.042          | <.0001  | 0.736    | 0.040          | <.0001  |
| 55-64                             | 0.759    | 0.032          | <.0001  | 0.560     | 0.041          | <.0001  | 0.979    | 0.040          | <.0001  |
| 65-74                             | 0.788    | 0.032          | <.0001  | 0.586     | 0.042          | <.0001  | 1.061    | 0.041          | <.0001  |
| 75+                               | 0.759    | 0.032          | <.0001  | 0.462     | 0.042          | <.0001  | 1.165    | 0.041          | <.0001  |

Table A4: Multilevel Poisson regression models of orthopaedic surgery for arthritis and injury: results for the effects of age and sex, Ontario: 2007-08

|                                   | MSD      |                |         | Arthritis |                |         | Injury   |                |         |
|-----------------------------------|----------|----------------|---------|-----------|----------------|---------|----------|----------------|---------|
|                                   | Estimate | Standard Error | p-value | Estimate  | Standard Error | p-value | Estimate | Standard Error | p-value |
| <b>Intercept</b>                  | -4.896   | 0.034          | <.0001  | -5.816    | 0.042          | <.0001  | -5.767   | 0.041          | <.0001  |
| <b>Sex</b><br>(Ref: Men)          | -0.669   | 0.036          | <.0001  | -0.459    | 0.047          | <.0001  | -1.082   | 0.058          | <.0001  |
| <b>Age groups</b><br>(Ref: 18-24) |          |                |         |           |                |         |          |                |         |
| 25-34                             | -0.002   | 0.032          | 0.947   | 0.194     | 0.040          | <.0001  | -0.211   | 0.047          | <.0001  |
| 35-44                             | 0.235    | 0.030          | <.0001  | 0.653     | 0.037          | <.0001  | -0.389   | 0.046          | <.0001  |
| 45-54                             | 0.682    | 0.029          | <.0001  | 1.250     | 0.036          | <.0001  | -0.270   | 0.045          | <.0001  |
| 55-64                             | 0.971    | 0.029          | <.0001  | 1.625     | 0.035          | <.0001  | -0.298   | 0.047          | <.0001  |
| 65-74                             | 1.121    | 0.030          | <.0001  | 1.792     | 0.036          | <.0001  | -0.227   | 0.051          | <.0001  |
| 75+                               | 1.142    | 0.031          | <.0001  | 1.550     | 0.037          | <.0001  | 0.811    | 0.045          | <.0001  |
| <b>Age by sex</b>                 |          |                |         |           |                |         |          |                |         |
| 25-34                             | 0.115    | 0.049          | 0.020   | -0.069    | 0.062          | 0.261   | 0.146    | 0.080          | 0.067   |
| 35-44                             | 0.341    | 0.047          | <.0001  | 0.035     | 0.057          | 0.541   | 0.576    | 0.076          | <.0001  |
| 45-54                             | 0.590    | 0.045          | <.0001  | 0.284     | 0.054          | <.0001  | 0.918    | 0.073          | <.0001  |
| 55-64                             | 0.834    | 0.044          | <.0001  | 0.488     | 0.053          | <.0001  | 1.487    | 0.074          | <.0001  |
| 65-74                             | 0.912    | 0.045          | <.0001  | 0.571     | 0.054          | <.0001  | 1.759    | 0.076          | <.0001  |
| 75+                               | 0.972    | 0.045          | <.0001  | 0.471     | 0.056          | <.0001  | 1.803    | 0.070          | <.0001  |

Table A5: Multilevel Poisson regression models of office visits to orthopaedic surgeons for arthritis and injury: results for the main and adjusted effects of access to primary care physicians (PCP), geographic availability of orthopaedic surgeons, and need indicators, Ontario: 2007-08

|                                                        | Arthritis                |                          | Injury                   |                          |
|--------------------------------------------------------|--------------------------|--------------------------|--------------------------|--------------------------|
|                                                        | Main effect models       | Adjusted model           | Main effect models       | Adjusted model           |
| <i>Access to PCP</i>                                   |                          |                          |                          |                          |
| Quintile V (highest)                                   | 0.93(0.81 - 1.05)        | <b>1.16(1.03 - 1.21)</b> | 1.10(0.95 - 1.27)        | <b>1.13(1.00 - 1.31)</b> |
| Quintile IV                                            | 0.90(0.80 - 1.02)        | 1.00(0.88 - 1.14)        | 1.03(0.90 - 1.17)        | 1.02(0.90 - 1.17)        |
| Quintile III                                           | 0.94(0.84 - 1.07)        | 0.98(0.87 - 1.11)        | 0.95(0.83 - 1.08)        | 0.94(0.82 - 1.07)        |
| Quintile II                                            | 1.01(0.89 - 1.13)        | 1.05(0.94 - 1.17)        | 0.98(0.87 - 1.10)        | 0.98(0.87 - 1.09)        |
| Quintile I (lowest)                                    | 1.00                     | 1.00                     | 1.00                     | 1.00                     |
| <i>Geographic availability of orthopaedic surgeons</i> |                          |                          |                          |                          |
| Quintile V (highest)                                   | 1.18(0.98 - 1.39)        | <b>1.34(1.10 - 1.63)</b> | 1.11(0.90 - 1.36)        | <b>1.18(1.01 - 1.51)</b> |
| Quintile IV                                            | 0.90(0.76 - 1.07)        | 0.97(0.81 - 1.17)        | 0.96(0.78 - 1.19)        | 1.01(0.80 - 1.28)        |
| Quintile III                                           | 1.06(0.89 - 1.25)        | 1.16(0.97 - 1.38)        | 0.93(0.76 - 1.15)        | 0.97(0.77 - 1.20)        |
| Quintile II                                            | 1.19(0.97 - 1.41)        | 1.24(0.99 - 1.47)        | 0.90(0.73 - 1.10)        | 0.94(0.76 - 1.16)        |
| Quintile I (lowest)                                    | 1.00                     | 1.00                     | 1.00                     | 1.00                     |
| <i>SES</i>                                             |                          |                          |                          |                          |
| Quintile V (highest)                                   | 0.93(0.78 - 1.11)        | 0.95(0.79 - 1.14)        | 1.09(0.88 - 1.34)        | <b>1.34(1.06 - 1.69)</b> |
| Quintile IV                                            | 0.98(0.83 - 1.17)        | 0.97(0.81 - 1.15)        | 0.98(0.80 - 1.20)        | 1.13(0.91 - 1.41)        |
| Quintile III                                           | 1.16(0.97 - 1.38)        | 1.05(0.89 - 1.25)        | 1.09(0.89 - 1.34)        | 1.10(0.89 - 1.36)        |
| Quintile II                                            | 0.99(0.83 - 1.17)        | 0.89(0.75 - 1.06)        | 1.20(0.98 - 1.47)        | 1.16(0.93 - 1.44)        |
| Quintile I (lowest)                                    | 1.00                     | 1.00                     | 1.00                     | 1.00                     |
| <i>Proportion of population ≥65 years</i>              |                          |                          |                          |                          |
| Quintile V (highest)                                   | <b>1.19(1.00 - 1.42)</b> | 1.13(0.95 - 1.35)        | <b>1.33(1.09 - 1.63)</b> | <b>1.37(1.10 - 1.70)</b> |
| Quintile IV                                            | 1.12(0.99 - 1.34)        | 1.09(0.92 - 1.29)        | <b>1.33(1.09 - 1.63)</b> | <b>1.39(1.12 - 1.71)</b> |
| Quintile III                                           | <b>1.22(1.02 - 1.45)</b> | 1.23(0.99 - 1.45)        | <b>1.26(1.03 - 1.53)</b> | <b>1.33(1.09 - 1.64)</b> |
| Quintile II                                            | 1.05(0.88 - 1.25)        | 1.01(0.86 - 1.19)        | 1.05(0.86 - 1.28)        | 1.10(0.89 - 1.34)        |
| Quintile I (lowest)                                    | 1.00                     | 1.00                     | 1.00                     | 1.00                     |
| <i>Proportion of rural population</i>                  |                          |                          |                          |                          |
| <15%                                                   | <b>0.84(0.74 - 0.96)</b> | 0.86(0.72 - 1.02)        | 0.96(0.82 - 1.12)        | 0.84(0.67 - 1.04)        |
| Intermediate (15-50% )                                 | 0.96(0.84 - 1.11)        | 0.97(0.83 - 1.12)        | 1.04(0.87 - 1.23)        | 0.98(0.81 - 1.17)        |
| Rural (≥50%)                                           | 1.00                     | 1.00                     | 1.00                     | 1.00                     |

Table A6: Multilevel Poisson regression models of orthopaedic surgery for arthritis and injury: results for the main and adjusted effects of access to primary care physicians (PCP), geographic availability of orthopaedic surgeons, and need indicators, Ontario: 2007-08

|                                                        | Arthritis                |                          | Injury                   |                          |
|--------------------------------------------------------|--------------------------|--------------------------|--------------------------|--------------------------|
|                                                        | Main effect models       | Adjusted model           | Main effect models       | Adjusted model           |
| <i>Access to PCP</i>                                   |                          |                          |                          |                          |
| Quintile V (highest)                                   | 0.93(0.80 - 1.09)        | 0.99(0.87 - 1.12)        | 0.90(0.78 - 1.05)        | 0.98(0.85 - 1.13)        |
| Quintile IV                                            | 1.01(0.87 - 1.17)        | 1.02(0.90 - 1.15)        | 0.87(0.74 - 1.02)        | 1.04(0.91 - 1.20)        |
| Quintile III                                           | 0.99(0.85 - 1.14)        | 1.02(0.91 - 1.15)        | 0.92(0.78 - 1.08)        | 1.04(0.91 - 1.19)        |
| Quintile II                                            | 1.01(0.88 - 1.17)        | 0.93(0.83 - 1.03)        | 0.98(0.84 - 1.16)        | 1.01(0.89 - 1.14)        |
| Quintile I (lowest)                                    | 1.00                     | 1.00                     | 1.00                     | 1.00                     |
| <i>Geographic availability of orthopaedic surgeons</i> |                          |                          |                          |                          |
| Quintile V (highest)                                   | 0.85(0.71 - 1.01)        | 0.86(0.73 - 1.00)        | 1.01(0.86 - 1.19)        | 1.15(0.98 - 1.35)        |
| Quintile IV                                            | <b>0.77(0.65 - 0.92)</b> | 0.91(0.79 - 1.05)        | 0.85(0.72 - 1.00)        | 1.03(0.88 - 1.20)        |
| Quintile III                                           | <b>0.81(0.67 - 0.96)</b> | 0.83(0.72 - 0.95)        | 0.87(0.74 - 1.02)        | 0.99(0.86 - 1.15)        |
| Quintile II                                            | 0.89(0.74 - 1.07)        | 0.77(0.67 - 0.89)        | 0.97(0.82 - 1.15)        | 1.05(0.90 - 1.21)        |
| Quintile I (lowest)                                    | 1.00                     | 1.00                     | 1.00                     | 1.00                     |
| <i>Office visits to orthopaedic surgeons</i>           |                          |                          |                          |                          |
| Quintile V (highest)                                   | <b>1.73(1.51 - 1.99)</b> | <b>1.73(1.51 - 1.99)</b> | <b>1.51(1.31 - 1.73)</b> | <b>1.38(1.20 - 1.59)</b> |
| Quintile IV                                            | <b>1.58(1.37 - 1.81)</b> | <b>1.46(1.26 - 1.69)</b> | <b>1.37(1.20 - 1.57)</b> | <b>1.24(1.08 - 1.41)</b> |
| Quintile III                                           | <b>1.44(1.25 - 1.66)</b> | <b>1.39(1.22 - 1.59)</b> | <b>1.24(1.09 - 1.42)</b> | <b>1.19(1.05 - 1.36)</b> |
| Quintile II                                            | <b>1.25(1.09 - 1.44)</b> | <b>1.14(1.00 - 1.29)</b> | 1.16(1.01 - 1.34)        | 1.12(0.97 - 1.29)        |
| Quintile I (lowest)                                    | 1.00                     | 1.00                     | 1.00                     | 1.00                     |
| <i>SES</i>                                             |                          |                          |                          |                          |
| Quintile V (highest)                                   | <b>0.83(0.69 - 0.99)</b> | 1.02(0.96 - 1.29)        | 0.87(0.74 - 1.02)        | 0.98(0.84 - 1.14)        |
| Quintile IV                                            | 0.88(0.73 - 1.05)        | 1.04(0.99 - 1.32)        | 0.92(0.78 - 1.08)        | 1.01(0.88 - 1.17)        |
| Quintile III                                           | 0.90(0.75 - 1.08)        | 0.93(0.81 - 1.06)        | 0.98(0.84 - 1.16)        | 0.98(0.85 - 1.12)        |
| Quintile II                                            | 0.91(0.76 - 1.09)        | 1.05(0.92 - 1.20)        | 1.04(0.89 - 1.22)        | 1.02(0.89 - 1.18)        |
| Quintile I (lowest)                                    | 1.00                     | 1.00                     | 1.00                     | 1.00                     |
| <i>Proportion of population ≥65 years</i>              |                          |                          |                          |                          |
| Quintile V (highest)                                   | <b>1.31(1.10 - 1.56)</b> | 1.04(0.90 - 1.20)        | <b>1.28(1.10 - 1.50)</b> | 1.02(0.88 - 1.19)        |
| Quintile IV                                            | <b>1.20(1.01 - 1.43)</b> | 1.02(0.89 - 1.16)        | <b>1.27(1.09 - 1.48)</b> | 1.05(0.90 - 1.22)        |
| Quintile III                                           | 1.18(0.99 - 1.40)        | 1.05(0.92 - 1.20)        | <b>1.18(1.01 - 1.37)</b> | 1.02(0.89 - 1.18)        |
| Quintile II                                            | 1.00(0.84 - 1.19)        | 0.99(0.87 - 1.13)        | <b>1.06(0.91 - 1.24)</b> | 1.00(0.87 - 1.14)        |
| Quintile I (lowest)                                    | 1.00                     | 1.00                     | 1.00                     | 1.00                     |
| <i>Proportion of rural population</i>                  |                          |                          |                          |                          |
| Urban (<15%)                                           | <b>0.75(0.67 - 0.85)</b> | <b>0.84(0.73 - 0.97)</b> | <b>0.81(0.72 - 0.90)</b> | <b>0.80(0.69 - 0.93)</b> |
| Intermediate (15-50%)                                  | 1.05(0.93 - 1.20)        | 1.11(0.99 - 1.25)        | 0.98(0.87 - 1.11)        | 0.94(0.83 - 1.06)        |
| Rural (≥50%)                                           | 1.00                     | 1.00                     | 1.00                     | 1.00                     |
